# Supplementary material for: Bladder cancer cells secrete while normal bladder cells express but do not secrete AGR2
Source: PubMed Central journal article supplement (PMC4941274; doi:10.18632/oncotarget.7400), 2016-02-15
Supplement: oncotarget-07-15747-s002.pdf [file oncotarget-07-15747-s002.pdf]

|         | AGR2         |                      |                   |                    |                      |        |    |    |                     |
|---------|--------------|----------------------|-------------------|--------------------|----------------------|--------|----|----|---------------------|
| patient | tumor center | tumor invasion front | lymph node mets I | lymph node mets II | overall survival yrs | gender | pT | pN | capsule perforation |
| B86-01  |              |                      |                   |                    | 1.9                  | m      | 3  | 2  | 1                   |
| B86-02  |              |                      |                   |                    | 1.6                  | m      | 3  | 2  | 1                   |
| B86-03  |              |                      |                   |                    | 0.8                  | m      | 4  | 2  | 1                   |
| B87-01  |              |                      |                   |                    | 1.3                  | m      | 4  | 2  | 1                   |
| B88-01  |              |                      |                   |                    | 4.8                  | m      | 2  | 2  | 0                   |
| B89-01  |              |                      |                   |                    | 0.4                  | f      | 3  | 2  | 1                   |
| B89-02  |              |                      |                   |                    | 4                    | m      | 3  | 2  | 1                   |
| B90-01  |              |                      |                   |                    | 18.9                 | m      | 3  | 2  | 1                   |
| B90-02  |              |                      |                   |                    | 3                    | m      | 4  | 2  | 1                   |
| B90-03  |              |                      |                   |                    | 18.6                 | m      | 4  | 2  | 0                   |
| B90-04  |              |                      |                   |                    | 0.4                  | m      | 4  | 2  | 1                   |
| B90-05  |              |                      |                   |                    | 3                    | f      | 3  | 2  | 1                   |
| B91-01  |              |                      |                   |                    | 0.4                  | m      | 4  | 2  | 0                   |
| B91-02  |              |                      |                   |                    | 15.8                 | m      | 3  | 2  | 0                   |
| B91-03  |              |                      |                   |                    | 0.2                  | m      | 3  | 1  | 0                   |
| B91-04  |              |                      |                   |                    | 5.3                  | f      | 3  | 2  | 0                   |
| B91-05  |              |                      |                   |                    | 14.6                 | m      | 4  | 2  | 0                   |
| B92-01  |              |                      |                   |                    | 7.8                  | m      | 3  | 2  | 0                   |
| B92-02  |              |                      |                   |                    | 8.3                  | m      | 3  | 2  | 1                   |
| B92-03  |              |                      |                   |                    | 1.5                  | m      | 4  | 2  | 1                   |
| B92-04  |              |                      |                   |                    | 14.1                 | m      | 1  | 2  | 0                   |
| B92-05  |              |                      |                   |                    | 2.5                  | m      | 4  | 1  | 1                   |
| B93-01  |              |                      |                   |                    | 0.2                  | m      | 4  | 2  | 1                   |
| B93-02  |              |                      |                   |                    | 0.2                  | m      | 3  | 2  | 1                   |
| B93-03  |              |                      |                   |                    | 1.1                  | m      | 3  | 2  | 0                   |
| B93-04  |              |                      |                   |                    | 5.1                  | m      | 3  | 2  | 1                   |
| B93-05  |              |                      |                   |                    | 7.3                  | m      | 2  | 3  | 1                   |
| B93-06  |              |                      |                   |                    | 0.6                  | m      | 3  | 2  | 1                   |
| B94-01  |              |                      |                   |                    | 14.5                 | f      | 4  | 2  | 0                   |
| B94-02  |              |                      |                   |                    | 1.9                  | m      | 3  | 2  | 1                   |
| B94-03  |              |                      |                   |                    | 14.6                 | f      | 3  | 2  | 0                   |
| B94-04  |              |                      |                   |                    | 1                    | f      | 4  | 2  | 1                   |
| B94-05  |              |                      |                   |                    | 0.1                  | m      | 3  | 2  | 1                   |
| B94-06  |              |                      |                   |                    | 1.1                  | m      | 4  | 2  | 1                   |
| B95-01  |              |                      |                   |                    | 0.7                  | m      | 4  | 2  | 1                   |
| B95-02  |              |                      |                   |                    | 4.2                  | m      | 3  | 2  | 1                   |
| B95-03  |              |                      |                   |                    | 4.5                  | m      | 3  | 3  | 1                   |
| B95-04  |              |                      |                   |                    | 5.2                  | f      | 3  | 2  | 1                   |
| B95-05  |              |                      |                   |                    | 3.1                  | m      | 3  | 2  | 0                   |
| B95-06  |              |                      |                   |                    | 4.1                  | m      | 3  | 2  | 0                   |
| B96-01  |              |                      |                   |                    | 6.2                  | m      | 4  | 2  | 1                   |
| B96-02  |              |                      |                   |                    | 1.2                  | f      | 4  | 2  | 1                   |
| B96-03  |              |                      |                   |                    | 0.4                  | m      | 4  | 2  | 1                   |
| B96-04  |              |                      |                   |                    | 9                    | f      | 3  | 2  | 0                   |
| B96-05  |              |                      |                   |                    | 1.6                  | m      | 3  | 3  | 1                   |
| B96-06  |              |                      |                   |                    | 1.9                  | f      | 3  | 2  | 1                   |
| B96-07  |              |                      |                   |                    | 2.1                  | m      | 4  | 2  | 1                   |
| B96-08  |              |                      |                   |                    | 0.4                  | m      | 3  | 2  | 1                   |
| B96-09  |              |                      |                   |                    | 0.7                  | m      | 3  | 2  | 0                   |

|        |  |  |  |  |      |   |   |   |   |
|--------|--|--|--|--|------|---|---|---|---|
| B96-10 |  |  |  |  | 8.8  | m | 2 | 2 | 0 |
| B97-01 |  |  |  |  | 1.9  | m | 4 | 2 | 1 |
| B97-02 |  |  |  |  | 1.3  | m | 3 | 2 | 1 |
| B97-03 |  |  |  |  | 1    | m | 4 | 3 | 1 |
| B97-04 |  |  |  |  | 0.7  | m | 3 | 2 | 0 |
| B97-05 |  |  |  |  | 0.6  | m | 3 | 1 | 0 |
| B98-01 |  |  |  |  | 0.8  | m | 4 | 3 | 0 |
| B97-06 |  |  |  |  | 0.1  | m | 3 | 2 | 1 |
| B98-02 |  |  |  |  | 0.1  | m | 3 | 2 | 1 |
| B98-03 |  |  |  |  | 10.9 | m | 3 | 2 | 0 |
| B98-04 |  |  |  |  | 0.5  | m | 3 | 3 | 1 |
| B98-05 |  |  |  |  | 0.6  | m | 2 | 1 | 0 |
| B98-06 |  |  |  |  | 10.9 | m | 3 | 1 | 0 |
| B98-07 |  |  |  |  | 1.1  | m | 4 | 1 | 1 |
| B98-08 |  |  |  |  | 2.1  | m | 3 | 2 | 1 |
| B98-09 |  |  |  |  | 1.2  | f | 3 | 1 | 1 |
| B98-10 |  |  |  |  | 1    | m | 3 | 1 | 0 |
| B98-11 |  |  |  |  | 2.8  | f | 3 | 2 | 1 |
| B99-01 |  |  |  |  | 10   | m | 2 | 2 | 0 |
| B99-02 |  |  |  |  | 5.8  | f | 3 | 2 | 1 |
| B99-03 |  |  |  |  | 1.8  | m | 3 | 2 | 1 |
| B99-04 |  |  |  |  | 2.4  | m | 3 | 1 | 0 |
| B99-05 |  |  |  |  | 0.2  | m | 3 | 2 | 1 |
| B99-06 |  |  |  |  | 1.6  | m | 3 | 2 | 1 |
| B00-01 |  |  |  |  | 0.2  | m | 3 | 2 | 1 |
| B00-02 |  |  |  |  | 0.2  | m | 4 | 2 | 0 |
| B00-03 |  |  |  |  | 4.2  | f | 2 | 2 | 0 |
| B00-04 |  |  |  |  | 6.8  | m | 3 | 2 | 1 |
| B00-05 |  |  |  |  | 0    | m | 4 | 2 | 1 |
| B00-06 |  |  |  |  | 3.2  | m | 3 | 2 | 0 |
| B00-07 |  |  |  |  | 7.6  | m | 3 | 2 | 0 |
| B00-08 |  |  |  |  | 0.3  | m | 4 | 2 | 1 |
| B00-09 |  |  |  |  | 0.9  | m | 3 | 2 | 1 |
| B01-01 |  |  |  |  | 7.5  | f | 2 | 2 | 0 |
| B01-02 |  |  |  |  | 0.7  | m | 4 | 2 | 0 |
| B01-03 |  |  |  |  | 8    | m | 3 | 2 | 0 |
| B01-04 |  |  |  |  | 8    | m | 2 | 1 | 0 |
| B01-05 |  |  |  |  | n/a  | m | 3 | 2 | 0 |
| B01-06 |  |  |  |  | 0.7  | m | 4 | 2 | 1 |
| B01-07 |  |  |  |  | 0.9  | m | 4 | 3 | 1 |
| B01-08 |  |  |  |  | 2.6  | m | 3 | 2 | 0 |
| B01-09 |  |  |  |  | 7.1  | m | 1 | 1 | 1 |
| B01-10 |  |  |  |  | 7.1  | m | 4 | 2 | 1 |
| B01-11 |  |  |  |  | 7    | m | 2 | 1 | 0 |
| B02-01 |  |  |  |  | 7.1  | m | 1 | 2 | 0 |
| B02-02 |  |  |  |  | 1.4  | m | 3 | 2 | 0 |
| B02-03 |  |  |  |  | 0.3  | m | 3 | 2 | 1 |
| B02-04 |  |  |  |  | 1.1  | m | 2 | 1 | 0 |
| B02-05 |  |  |  |  | 6    | f | 3 | 2 | 0 |
| B02-06 |  |  |  |  | 1.3  | m | 3 | 2 | 0 |
| B02-07 |  |  |  |  | 0.1  | m | 4 | 2 | 1 |
| B02-08 |  |  |  |  | 1.5  | m | 3 | 1 | 0 |

|        |  |  |  |  |     |   |   |   |   |
|--------|--|--|--|--|-----|---|---|---|---|
| B03-01 |  |  |  |  | 3.7 | m | 2 | 2 | 0 |
| B03-02 |  |  |  |  | 0.8 | m | 3 | 2 | 0 |
| B03-03 |  |  |  |  | 6   | m | 2 | 1 | 0 |
| B03-04 |  |  |  |  | 4.1 | m | 2 | 1 | 0 |
| B03-05 |  |  |  |  | 1   | m | 4 | 2 | 0 |
| B03-06 |  |  |  |  | 2.1 | m | 3 | 2 | 0 |
| B03-07 |  |  |  |  | 0   | m | 3 | 2 | 1 |
| B03-08 |  |  |  |  | 4.6 | m | 3 | 2 | 0 |
| B03-09 |  |  |  |  | 1.5 | m | 1 | 1 | 0 |
| B03-10 |  |  |  |  | 1.3 | m | 3 | 2 | 1 |
| B03-11 |  |  |  |  | 5   | m | 3 | 1 | 0 |
| B04-01 |  |  |  |  | 2.4 | m | 3 | 1 | 0 |
| B04-02 |  |  |  |  | 1.3 | f | 3 | 2 | 1 |
| B04-03 |  |  |  |  | 2   | f | 4 | 2 | 1 |
| B04-04 |  |  |  |  | 4.8 | f | 4 | 2 | 1 |
| B04-05 |  |  |  |  | 0.9 | f | 3 | 2 | 0 |
| B04-06 |  |  |  |  | 2.8 | m | 2 | 2 | 1 |
| B04-07 |  |  |  |  | 0.2 | m | 4 | 2 | 0 |
| B04-08 |  |  |  |  | 4.4 | m | 3 | 1 | 0 |
| B04-09 |  |  |  |  | 0.7 | f | 3 | 3 | 1 |
| B04-10 |  |  |  |  | 0.1 | m | 3 | 2 | 0 |
| B04-11 |  |  |  |  | 1.7 | m | 4 | 3 | 1 |
| B04-12 |  |  |  |  | 2   | m | 3 | 2 | 1 |
| B04-13 |  |  |  |  | 4   | m | 3 | 2 | 1 |
| B04-14 |  |  |  |  | 4.1 | f | 3 | 2 | 0 |
| B05-01 |  |  |  |  | 4.1 | f | 3 | 2 | 0 |
| B05-02 |  |  |  |  | 0.5 | f | 3 | 2 | 0 |
| B05-03 |  |  |  |  | 2   | m | 4 | 1 | 0 |
| B05-04 |  |  |  |  | 1.8 | m | 3 | 2 | 1 |
| B05-05 |  |  |  |  | 1.3 | m | 3 | 2 | 1 |
| B05-06 |  |  |  |  | 2.9 | f | 3 | 1 | 0 |
| B06-01 |  |  |  |  | 1.2 | m | 2 | 3 | 1 |
| B06-02 |  |  |  |  | 0.4 | m | 3 | 2 | 0 |
| B06-03 |  |  |  |  | 2.4 | f | 3 | 1 | 0 |
| B06-04 |  |  |  |  | 2.6 | m | 2 | 1 | 0 |
| B06-05 |  |  |  |  | 2.5 | m | 3 | 3 | 1 |
| B06-06 |  |  |  |  | 2.8 | m | 3 | 1 | 1 |
| B07-01 |  |  |  |  | 0.6 | m | 3 | 3 | 1 |
| B07-02 |  |  |  |  | 2   | m | 3 | 1 | 0 |
| B07-03 |  |  |  |  | 2   | m | 4 | 1 | 0 |
| B07-04 |  |  |  |  | 1.9 | f | 3 | 1 | 1 |
| B07-05 |  |  |  |  | 1.6 | f | 3 | 3 | 1 |
| B07-06 |  |  |  |  | 1.8 | m | 2 | 3 | 0 |
| B07-07 |  |  |  |  | 1.6 | m | 3 | 1 | 0 |
| B07-08 |  |  |  |  | 1   | m | 3 | 3 | 1 |
| B07-09 |  |  |  |  | 1.3 | m | 3 | 3 | 1 |
| B07-10 |  |  |  |  | 0.9 | m | 3 | 3 | 1 |
| B07-11 |  |  |  |  | 0.3 | m | 4 | 3 | 1 |
| B08-01 |  |  |  |  | 1   | m | 3 | 2 | 0 |
| B08-02 |  |  |  |  | 1   | f | 3 | 2 | 1 |
| B08-03 |  |  |  |  | 1   | m | 3 | 1 | 0 |

|  |               |
|--|---------------|
|  | strong 3+     |
|  | moderate 2+   |
|  | weak/focal 1+ |
|  | faint 0+      |
|  | negative      |
|  | no data       |

|  |                |
|--|----------------|
|  | survival >10 y |
|  | survival <1 y  |
